# Supplementary material for: Asthma-associated genetic variants induce IL33 differential expression through an enhancer-blocking regulatory region
Source: PubMed Central journal article supplement (PMC8531453; doi:10.1038/s41467-021-26347-z), 2021-10-21
Supplement: 41467_2021_26347_MOESM1_ESM.pdf [file 41467_2021_26347_MOESM1_ESM.pdf]

## Supplementary Information

### **Asthma-associated variants induce *IL33* differential expression through a novel regulatory region**

Ivy Aneas<sup>1\*^</sup>, Donna C. Decker<sup>2\*</sup>, Chanie L. Howard<sup>3</sup>, Débora R. Sobreira<sup>1</sup>, Noboru J. Sakabe<sup>1</sup>, Kelly M. Blaine<sup>2</sup>, Michelle M. Stein<sup>1</sup>, Cara L. Hrusch<sup>2</sup>, Lindsey E. Montefiori<sup>1</sup>, Juan Tena<sup>4</sup>, Kevin M. Magnaye<sup>1</sup>, Selene M. Clay<sup>1</sup>, James E. Gern<sup>5</sup>, Daniel J. Jackson<sup>5</sup>, Matthew C. Altman<sup>6</sup>, Edward T. Naureckas<sup>2</sup>, Douglas K. Hogarth<sup>2</sup>, Steven R. White<sup>2</sup>, Jose Luis Gomez-Skarmeta<sup>4</sup>, Nathan Schoetler<sup>2</sup>, Carole Ober<sup>1</sup>, Anne I. Sperling<sup>2,3\*^</sup>, Marcelo A. Nobrega<sup>1</sup>

#### Author affiliations:

1- Department of Human Genetics, University of Chicago, Chicago, IL 60637, USA.

2- Department of Medicine, Section of Pulmonary and Critical Care Medicine, University of Chicago, Chicago, IL 60637, USA.

3- Committee on Immunology, University of Chicago, Chicago IL 60637

4- Centro Andaluz de Biología del Desarrollo (CSIC/UPO/JA), Universidad Pablo de Olavide, Seville 41013, Spain.

5- Department of Pediatrics, University of Wisconsin School of Medicine and Public Health, Madison, WI 53726, USA

6- Division of Allergy and Infectious Diseases, Department of Medicine, University of Washington, Seattle, WA 98195, USA

\*These authors contributed equally to this study

^ Corresponding Authors:

**Supplementary Figure 1-8**

**Supplementary Table 1-8**

a CEU (n=99)

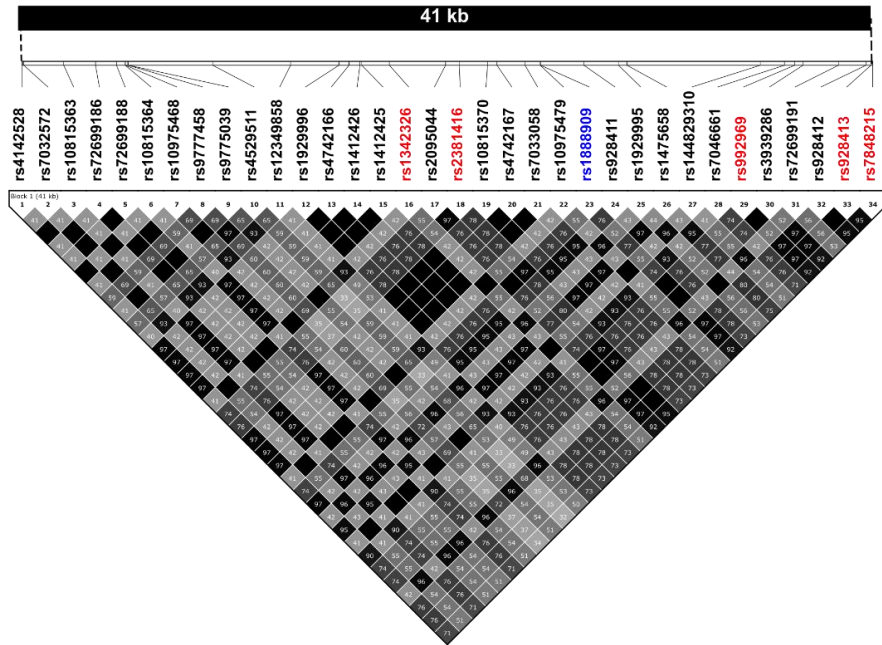

b ASW (n=69)

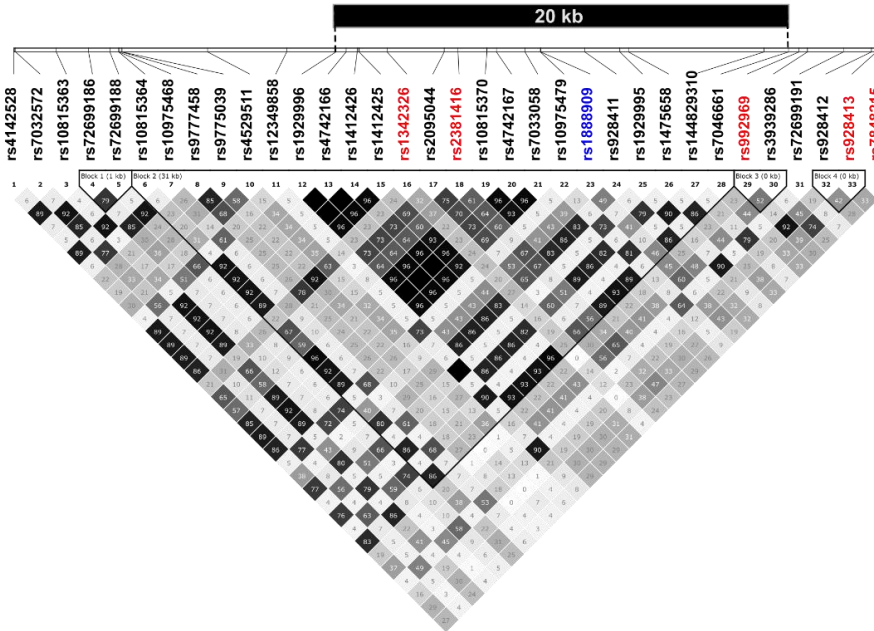

**Supplementary Figure 1.** 41kb LD blocks created with Haploview software (v4.2) using a MAF=0.1. Genomic coordinates are chr9: 6,172,380-6,213,488 (hg19). Positions of the five lead SNPs (in red) from seven GWAS studies are marked on the Caucasian (CEU) plot. **(a)** and Americans with African ancestry from SW USA (ASW) plots **(b)**. The lead SNP rs1888909 in African Ancestry is shown in blue. The 34 SNPs shown in the plot are either in LD with one of five lead SNPs (in red) in European ( $r^2 \geq 0.8$ ), African ancestry ( $r^2 \geq 0.4$ ) or both populations. (HaploReg v4, <https://pubs.broadinstitute.org/mammals/haploreg/haploreg.php>)

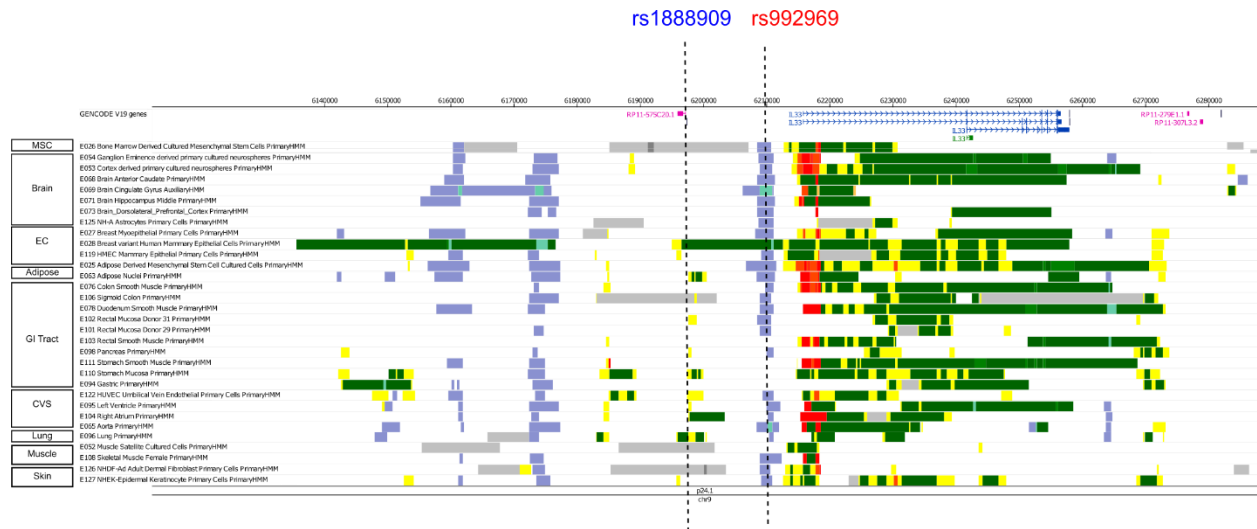

**Supplementary Figure 2. Roadmap Epigenome analysis at the *IL33* locus.** Rs992969 (in red) was the lead SNP in the combined multi-ancestry GWAS studies, while rs1888909 (in blue) was the lead in the African American/African Caribbean GWAS. Chromatin states from Roadmap Epigenomics Project showing regions with potential regulatory activity- yellow: active enhancer; green: transcription; blue: heterochromatin; red: active TSS; gray: weak repressed polycomb.

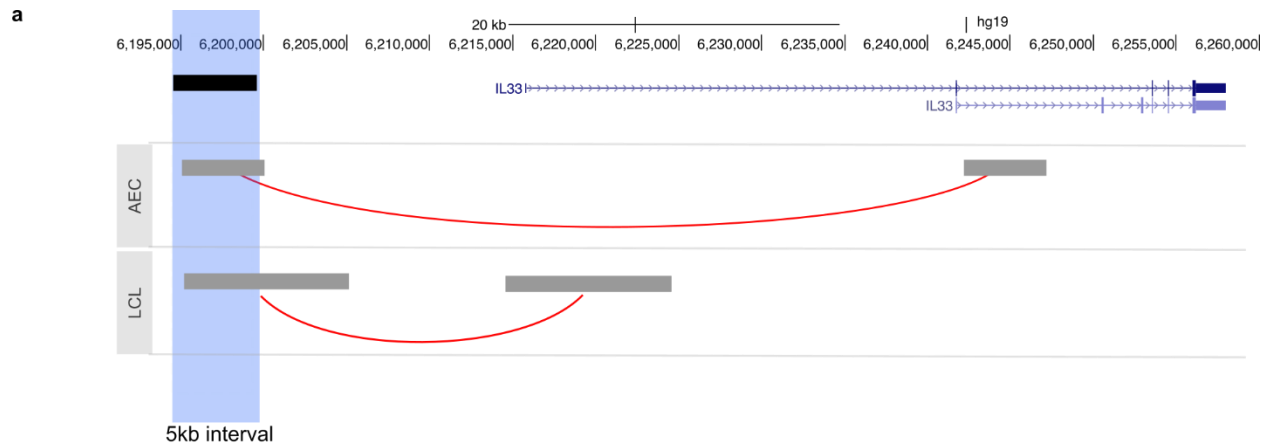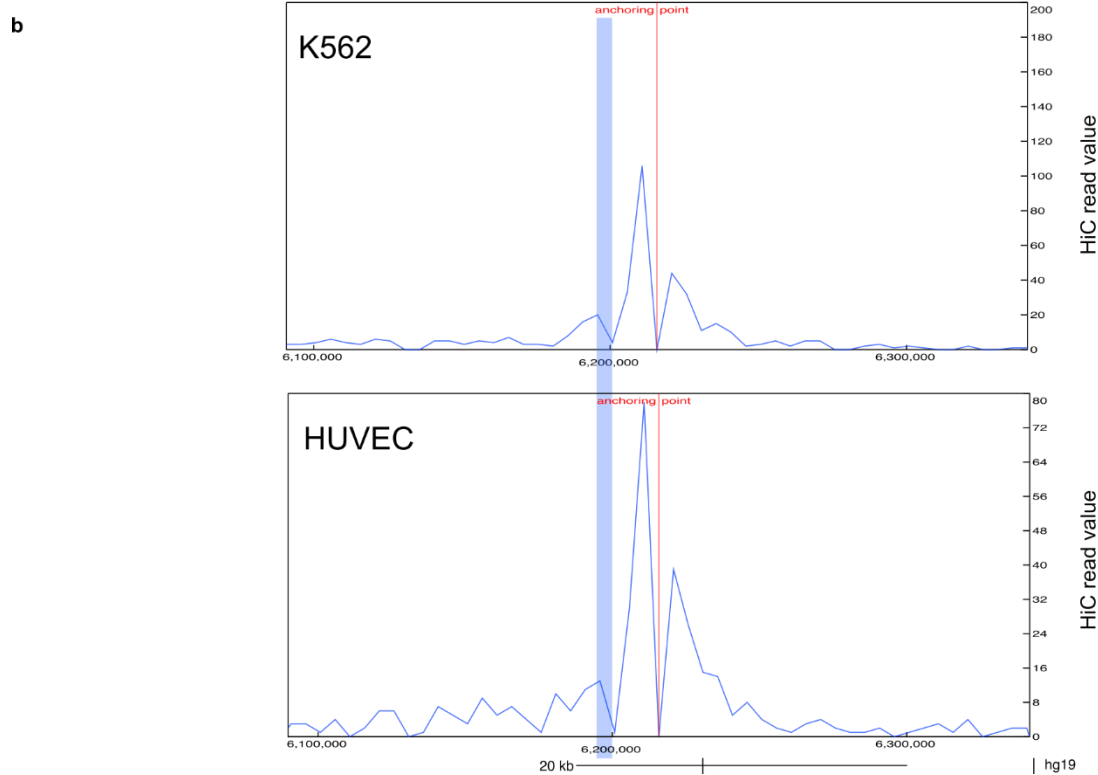

**Supplementary Figure 3. Interaction maps show looping of the asthma-associated region to the *IL33* promoter.** **a** Promoter Capture Hi-C from freshly isolated human bronchial epithelial cells (AEC, GEO accession: GSE152550) and human lymphoblastoid cells (LCL; GEO accession: GSE79718; <https://www.ncbi.nlm.nih.gov/geo/>). Gray Bars correspond to 5kb or 10kb resolution Homer interactions. Arcs depict interactions between the asthma associated 5kb region (blue shaded box) and *IL33* gene. **b** Virtual 4C plots using Hi-C data from myelogenous leukemia cells (K562) and human umbilical vein endothelial cells (HUVEC) from the 3D genome browser (<http://3dgenome.fsm.northwestern.edu/>). In each plot, the anchoring point (red line) marks the position of the *IL33* promoter. Blue shaded box depicts the GWAS- asthma associated 5kb region.

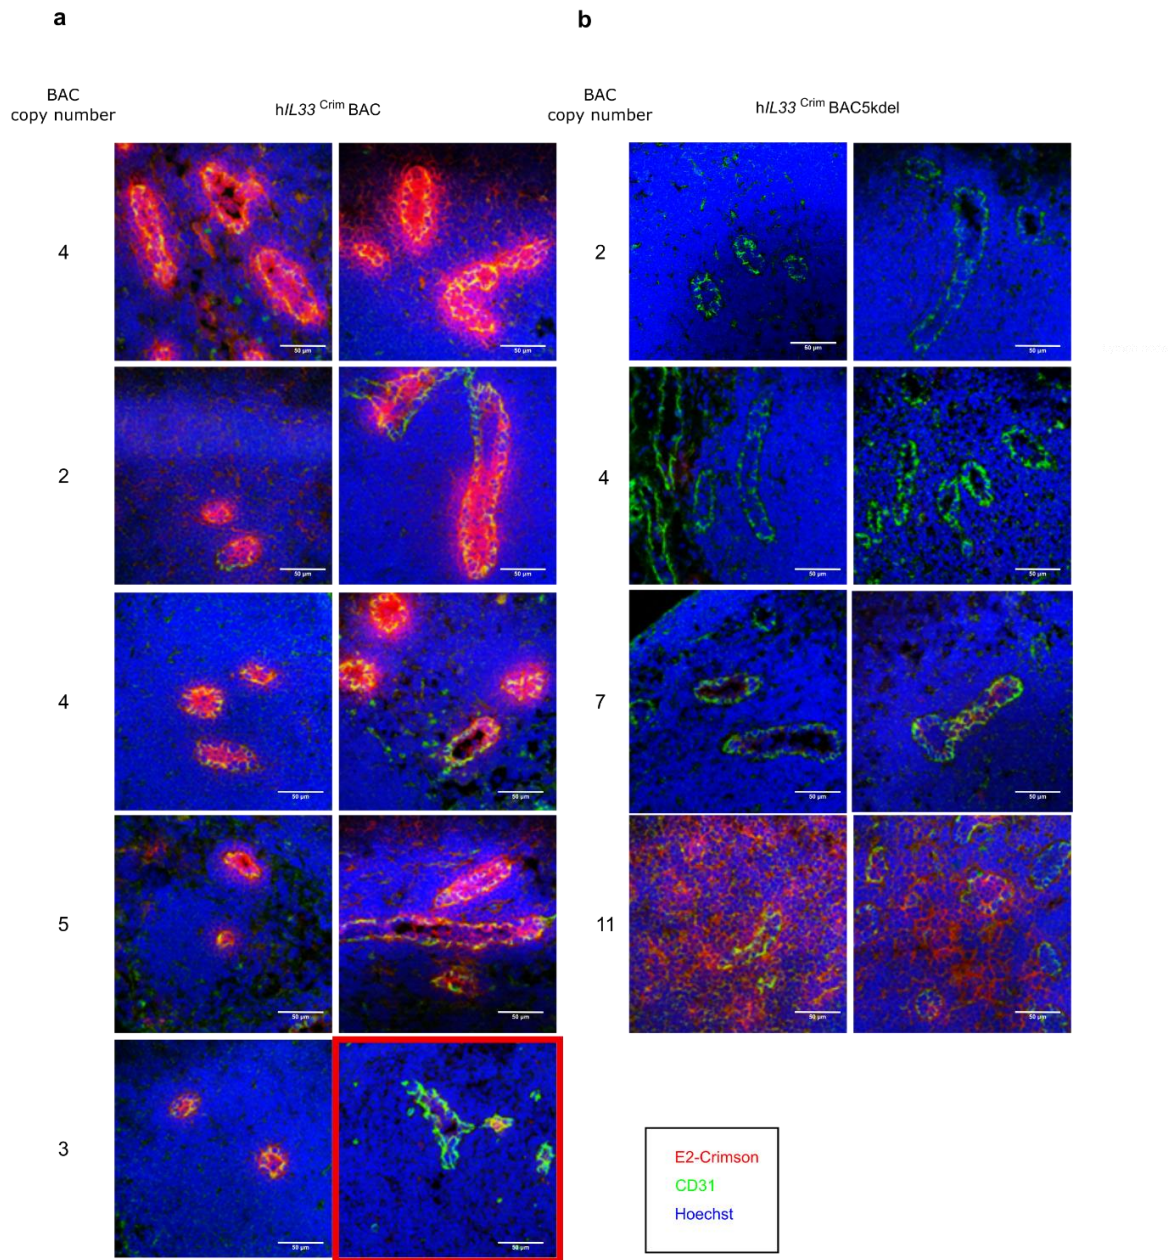

**Supplementary Figure 4. Immunohistochemistry of five  $hIL33^{Crim}BAC$  (a) and four  $hIL33^{Crim}BAC5kdel$  (b) independent transgenic lines.** Estimated BAC copy number is listed adjacent to each founder line. Lymph node sections from two F1 mice for each line are shown. Red indicates Crimson expression. All sections except for one (red box) were stained with  $\alpha E2$ -Crimson antibody and illustrate baseline Crimson expression. Green indicates staining with  $\alpha CD31$ . Nucleic acid stain Hoechst is blue. Scale bar: 50  $\mu M$

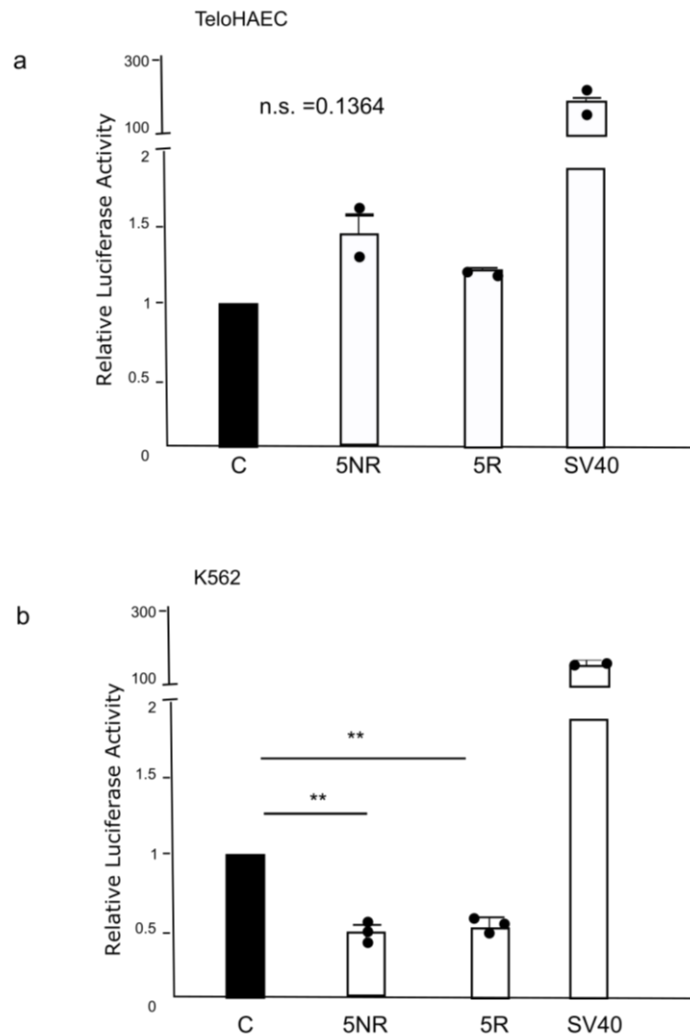

**Supplementary Figure 5. Luciferase enhancer assay.** Human aortic endothelial cells (TeloHAEC) (**a**) and K562 (**b**) were transfected with a 5kb (chr9: 6,194,500-6,199,500; hg19) construct containing the non-risk (NR) or the risk (R) asthma-associated alleles. As a negative control (scramble), we used a DNA sequence (chr9: 6,161,550-6,162,024; hg19) devoid of any epigenetic mark and as positive control we used PGL3 control vector (SV40; Promega). Firefly luciferase/renilla luciferase provide the normalized luciferase activity. Fold change was calculated relative to the control sequence. Data are presented as mean  $\pm$  SEM (n=2 independent TeloHAEC experiments; and n= 3 independent DNA preparations examined over 2 independent K562 experiments): \*\*0.047 (C vs 5NR), \*\*0.032 (C vs 5R); one-way ANOVA with post-roc Sidak multiple comparison test. Source data are provided as a Source Data file.

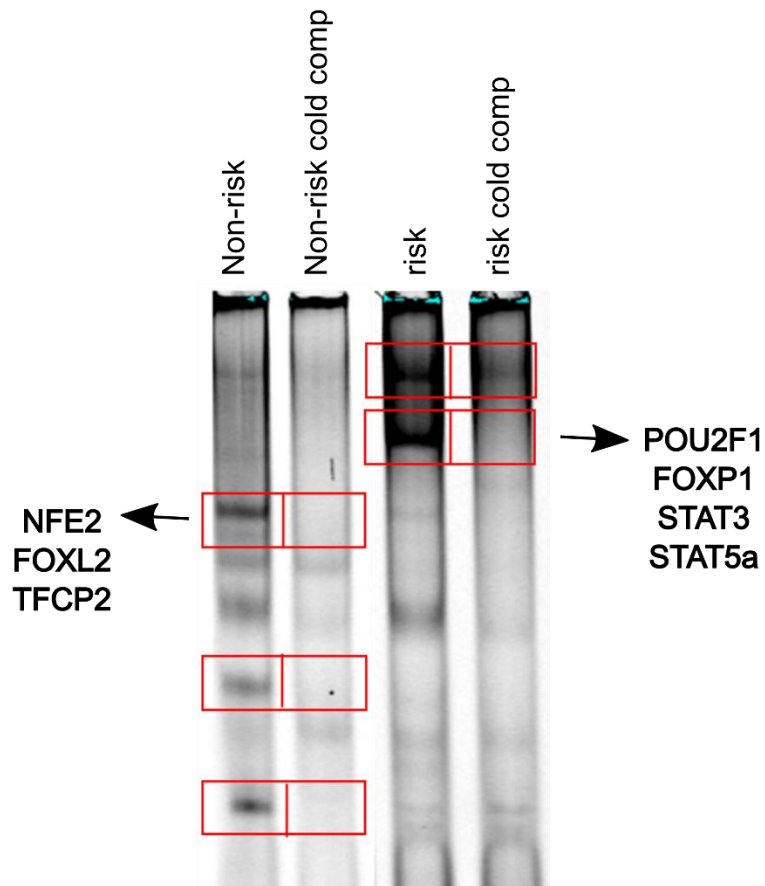

**Supplementary Figure 6. EMSA assay showing outline of bands extracted for mass spectrometry.** Unique transcription factors with a known DNA binding motif are listed next to the boxed bands. Note that no transcription factors were identified in two of the bands from non-risk and one of the bands from risk. Risk and non-risk cold competitor lanes were used as experimental control.

a

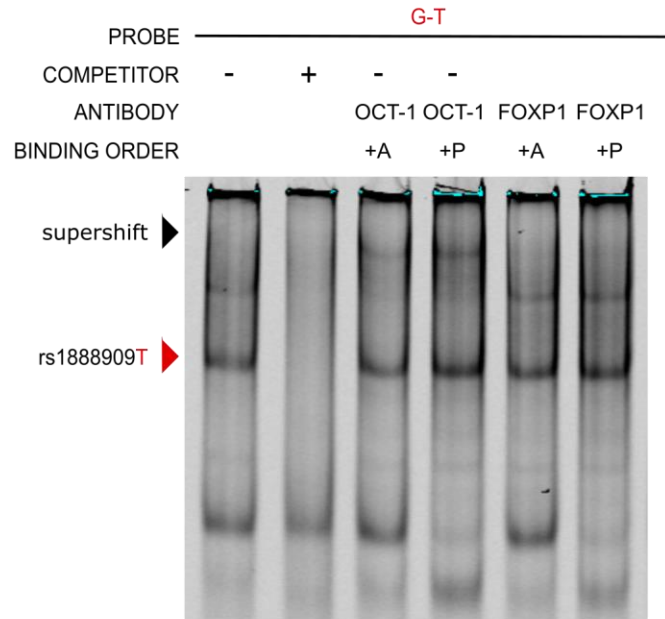

b

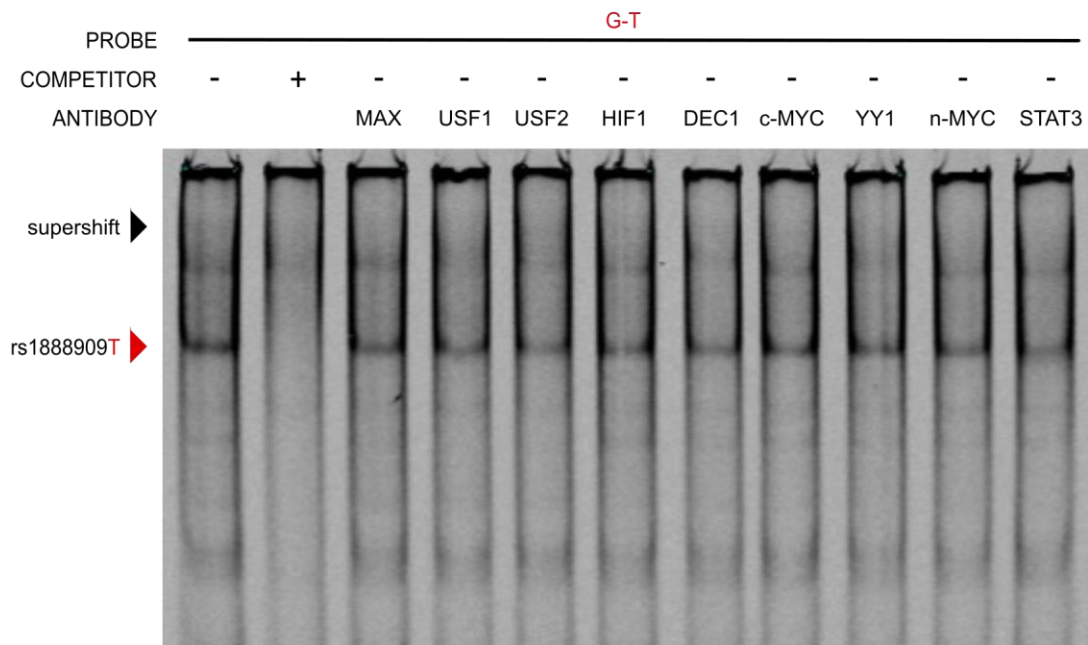

**Supplementary Figure 7. EMSA supershift assay.** Transcription factors identified by mass spectrometry (a) or predicted by Transfac to bind to alleles of SNPs rs1888909 (b).



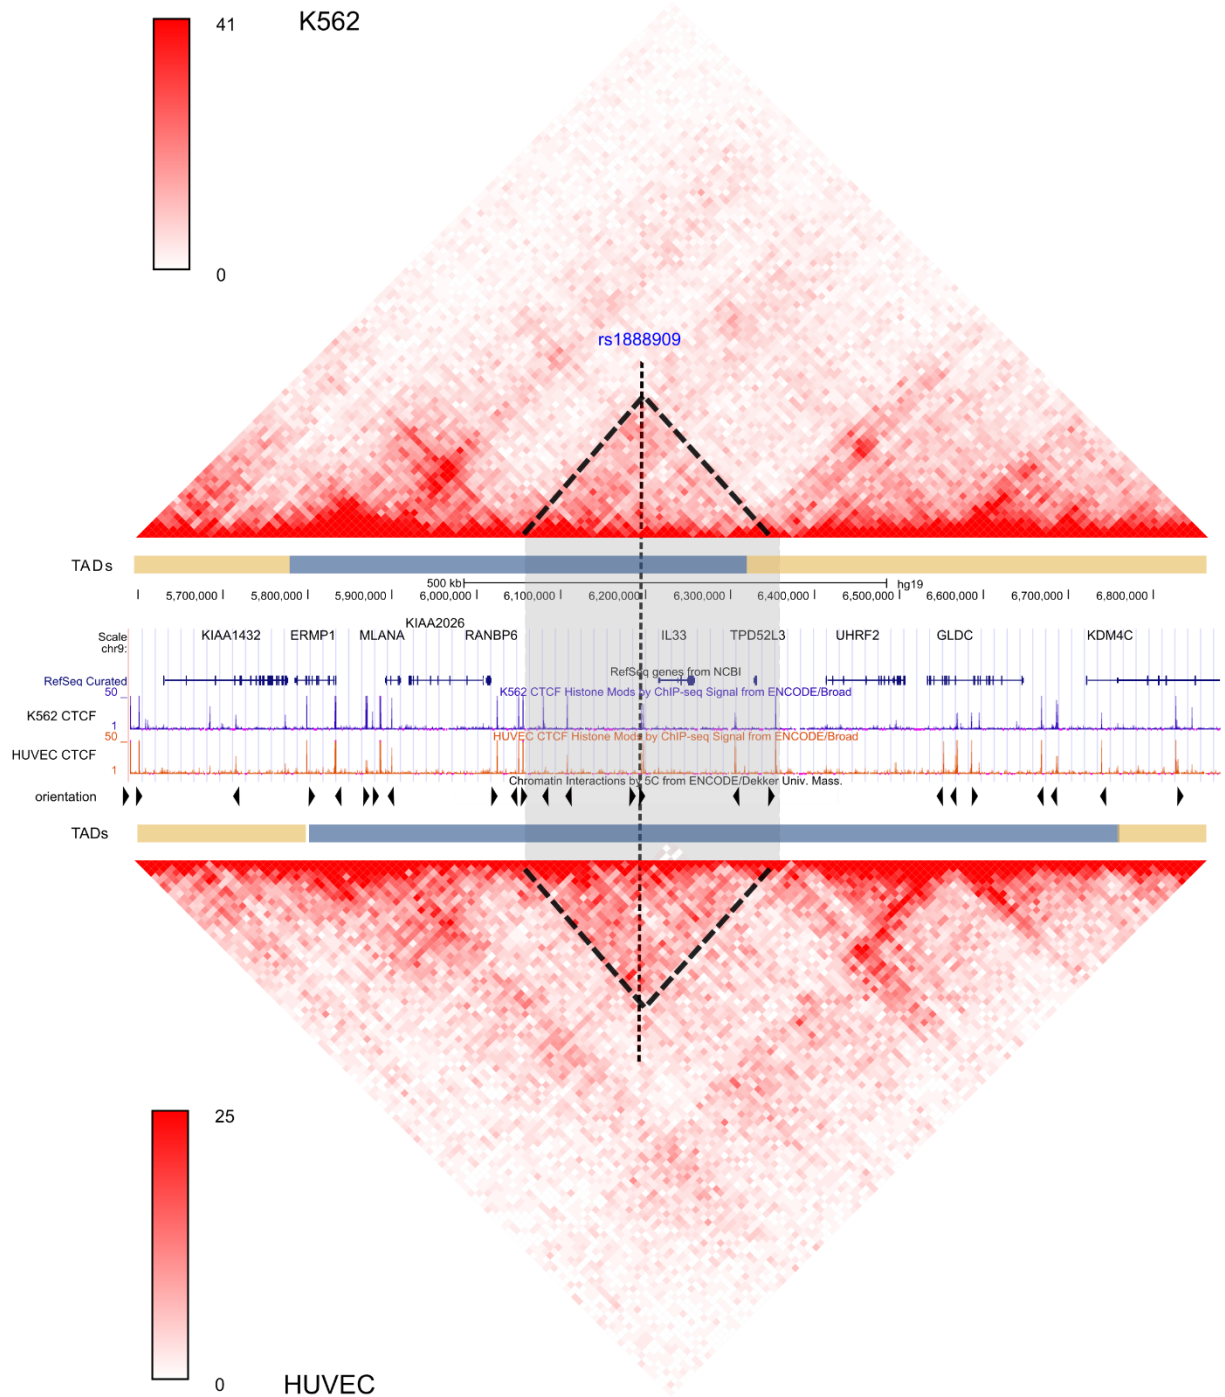

**Supplementary Figure 8. TAD structure of the *IL33* locus.** A 10-Mb region of K562 and HUVEC Hi-C interaction map at 10kb resolution (hg19; chr9:5590000-6880000.) The alternating yellow and blue bars are predicted TADs. ChIP-Seq tracks for CTCF binding are visualized using the UCSC genome Browser. Black arrow heads show the CTCF orientation. Black dotted line marks a sub-TAD containing the 5kb asthma associated region and the *IL33* gene. Position of SNP rs1888909 (in blue) is marked.

**Supplementary Table 1.** SNPs in LD ( $r^2 \geq 0.80$ ) with at least one of the five lead SNPs. A total of 26 SNPs spans a 41kb interval in the CEU population. SNPs.

| <i>chr</i> | <i>position (hg19)</i> | <i>variant</i>      | <i>Ref</i> | <i>Alt</i> | <i>AFR freq</i> | <i>AMR freq</i> | <i>ASN freq</i> | <i>EUR freq</i> | <i>GENCODE genes</i>    |
|------------|------------------------|---------------------|------------|------------|-----------------|-----------------|-----------------|-----------------|-------------------------|
| 9          | 6172380                | rs7032572           | A          | G          | 0.15            | 0.14            | 0.00            | 0.16            | 43kb 5' of <i>IL33</i>  |
| 9          | 6175855                | rs72699186          | A          | T          | 0.16            | 0.14            | 0.00            | 0.15            | 40kb 5' of <i>IL33</i>  |
| 9          | 6176871                | rs72699188          | C          | G          | 0.14            | 0.13            | 0.00            | 0.15            | 39kb 5' of <i>IL33</i>  |
| 9          | 6177302                | rs10975468          | C          | T          | 0.15            | 0.13            | 0.00            | 0.15            | 39kb 5' of <i>IL33</i>  |
| 9          | 6177453                | rs9775039           | G          | A          | 0.30            | 0.14            | 0.00            | 0.15            | 38kb 5' of <i>IL33</i>  |
| 9          | 6178525                | rs144511606         | G          | A          | 0.15            | 0.14            | 0.00            | 0.15            | 37kb 5' of <i>IL33</i>  |
| 9          | 6185295                | rs12349858          | C          | T          | 0.07            | 0.13            | 0.00            | 0.16            | 31kb 5' of <i>IL33</i>  |
| 9          | 6187636                | rs1929996           | C          | G          | 0.28            | 0.71            | 0.94            | 0.72            | 28kb 5' of <i>IL33</i>  |
| 9          | 6188124                | rs4742166^          | G          | C          | 0.28            | 0.72            | 0.93            | 0.72            | 28kb 5' of <i>IL33</i>  |
| 9          | 6188652                | rs1412426^          | A          | C,T        | 0.28            | 0.71            | 0.93            | 0.72            | 27kb 5' of <i>IL33</i>  |
| 9          | 6190076                | <b>rs1342326</b> *^ | A          | C          | 0.36            | 0.14            | 0.00            | 0.15            | 26kb 5' of <i>IL33</i>  |
| 9          | 6192796                | rs2095044^          | T          | C          | 0.34            | 0.76            | 0.93            | 0.76            | 23kb 5' of <i>IL33</i>  |
| 9          | 6193455                | <b>rs2381416</b> *^ | C          | A          | 0.39            | 0.77            | 0.93            | 0.76            | 22kb 5' of <i>IL33</i>  |
| 9          | 6194831                | rs10815370^         | C          | A          | 0.27            | 0.71            | 0.93            | 0.72            | 21kb 5' of <i>IL33</i>  |
| 9          | 6195285                | rs4742167^          | C          | T          | 0.28            | 0.71            | 0.93            | 0.72            | 21kb 5' of <i>IL33</i>  |
| 9          | 6196645                | rs7033058^          | T          | C          | 0.29            | 0.71            | 0.94            | 0.72            | 19kb 5' of <i>IL33</i>  |
| 9          | 6197377                | rs10975479^         | A          | G          | 0.08            | 0.13            | 0.00            | 0.15            | 18kb 5' of <i>IL33</i>  |
| 9          | 6197392                | rs1888909*^         | T          | C          | 0.52            | 0.78            | 0.97            | 0.76            | 18kb 5' of <i>IL33</i>  |
| 9          | 6201163                | rs1929995^          | T          | C          | 0.07            | 0.13            | 0.00            | 0.16            | 15kb 5' of <i>IL33</i>  |
| 9          | 6208030                | rs144829310^        | G          | T          | 0.06            | 0.12            | 0.00            | 0.15            | 7.8kb 5' of <i>IL33</i> |
| 9          | 6209697                | <b>rs992969</b> *^  | A          | G          | 0.68            | 0.79            | 0.97            | 0.76            | 6.1kb 5' of <i>IL33</i> |
| 9          | 6210099                | rs3939286           | T          | C          | 0.48            | 0.78            | 0.97            | 0.76            | 5.7kb 5' of <i>IL33</i> |
| 9          | 6211813                | rs72699191          | T          | C          | 0.05            | 0.12            | 0.00            | 0.16            | 4.0kb 5' of <i>IL33</i> |
| 9          | 6213148                | rs928412            | A          | G          | 0.68            | 0.79            | 0.96            | 0.75            | 2.7kb 5' of <i>IL33</i> |
| 9          | 6213387                | <b>rs928413</b> *   | G          | A          | 0.42            | 0.78            | 0.94            | 0.75            | 2.4kb 5' of <i>IL33</i> |
| 9          | 6213468                | <b>rs7848215</b> *  | C          | T          | 0.58            | 0.22            | 0.06            | 0.25            | 2.3kb 5' of <i>IL33</i> |

\* lead SNP

^ SNPs defining an LD block of 20kb (chr9: 6,188,124-6,209,099)

**Supplementary Table 2.** Sum of Single Effects (SuSiE)<sup>22</sup> to fine-map the associated region and identify credible sets (CS) of variants at the *IL33* locus with high probabilities of being causal. CS1 (n=6), CS2 (n=25) and CS3(n=28) are the three CS regions identified.

| <i>CS</i> | <i>SNP</i> | <i>position</i> | <i>P value</i> | <i>PIP</i> |
|-----------|------------|-----------------|----------------|------------|
| CS1       | rs992969   | 6209697         | 6.76E-42       | 0.391063   |
| CS1       | rs1888909  | 6197392         | 2.07E-41       | 0.208944   |
| CS1       | rs3939286  | 6210099         | 1.86E-41       | 0.204711   |
| CS1       | rs7848215  | 6213468         | 7.80E-42       | 0.085221   |
| CS1       | rs928412   | 6213148         | 4.38E-41       | 0.049622   |
| CS1       | rs2381416  | 6193455         | 1.25E-40       | 0.030186   |
|           |            |                 |                |            |
| CS2       | rs1330124  | 6053098         | 2.36E-26       | 0.093386   |
| CS2       | rs343495   | 6069445         | 2.07E-26       | 0.088878   |
| CS2       | rs343487   | 6062269         | 4.54E-26       | 0.053872   |
| CS2       | rs343491   | 6064640         | 5.43E-26       | 0.047065   |
| CS2       | rs397505   | 6076823         | 1.99E-26       | 0.043794   |
| CS2       | rs343490   | 6064575         | 6.01E-26       | 0.043789   |
| CS2       | rs378952   | 6078146         | 1.91E-26       | 0.043609   |
| CS2       | rs10975413 | 6049843         | 6.49E-26       | 0.041792   |
| CS2       | rs343489   | 6064299         | 6.73E-26       | 0.039977   |
| CS2       | rs451974   | 6076844         | 2.40E-26       | 0.038493   |
| CS2       | rs340934   | 6081804         | 5.25E-26       | 0.037143   |
| CS2       | rs371454   | 6078614         | 3.08E-26       | 0.032018   |
| CS2       | rs343479   | 6054314         | 1.37E-25       | 0.028717   |
| CS2       | rs189348   | 6073194         | 5.39E-26       | 0.028704   |
| CS2       | rs380568   | 6055531         | 1.31E-25       | 0.028074   |
| CS2       | rs401834   | 6078991         | 3.68E-26       | 0.027771   |
| CS2       | rs343475   | 6073013         | 6.15E-26       | 0.026056   |
| CS2       | rs393556   | 6056468         | 1.59E-25       | 0.024546   |
| CS2       | rs10975418 | 6057011         | 1.73E-25       | 0.023440   |
| CS2       | rs340935   | 6080998         | 1.25E-25       | 0.022409   |
| CS2       | rs10975412 | 6049547         | 2.51E-25       | 0.021368   |
| CS2       | rs343496   | 6068077         | 1.08E-25       | 0.020070   |
| CS2       | rs343499   | 6059157         | 2.37E-25       | 0.019209   |
| CS2       | rs343476   | 6072597         | 1.18E-25       | 0.016354   |
|           |            |                 |                |            |
| CS3       | rs10815391 | 6240235         | 5.67E-30       | 0.074113   |
| CS3       | rs10815392 | 6240236         | 5.67E-30       | 0.074098   |
| CS3       | rs12339348 | 6233082         | 3.72E-30       | 0.073122   |
| CS3       | rs10815393 | 6240324         | 4.51E-30       | 0.070343   |
| CS3       | rs7035413  | 6243119         | 6.89E-30       | 0.065363   |
| CS3       | rs7038893  | 6243392         | 9.09E-30       | 0.063107   |
| CS3       | rs17582919 | 6233376         | 7.05E-30       | 0.060414   |
| CS3       | rs17498196 | 6237547         | 9.47E-30       | 0.05379    |

|     |             |         |          |          |
|-----|-------------|---------|----------|----------|
| CS3 | rs10975504  | 6235009 | 9.17E-30 | 0.051897 |
| CS3 | rs72689561  | 6238750 | 1.54E-29 | 0.047636 |
| CS3 | rs78757963  | 6282511 | 2.44E-19 | 0.047079 |
| CS3 | rs10975507  | 6236977 | 1.65E-29 | 0.037797 |
| CS3 | rs76962799  | 6187132 | 1.40E-20 | 0.035635 |
| CS3 | rs7851246   | 6362365 | 7.51E-28 | 0.025082 |
| CS3 | rs7027505   | 6345740 | 4.08E-28 | 0.024066 |
| CS3 | rs16924428  | 6351111 | 6.52E-28 | 0.023837 |
| CS3 | rs10975547  | 6343945 | 4.60E-28 | 0.022612 |
| CS3 | rs59606381  | 6362124 | 1.38E-27 | 0.019674 |
| CS3 | rs7850988   | 6335760 | 6.74E-28 | 0.018757 |
| CS3 | rs72689565  | 6240953 | 2.84E-28 | 0.017263 |
| CS3 | rs10975558  | 6364449 | 2.35E-27 | 0.016619 |
| CS3 | rs16924356  | 6331610 | 7.02E-28 | 0.01507  |
| CS3 | rs10491836  | 6331421 | 7.55E-28 | 0.014958 |
| CS3 | rs2169287   | 6305904 | 2.05E-28 | 0.013794 |
| CS3 | rs10739094  | 6333685 | 1.60E-27 | 0.013582 |
| CS3 | rs72691711  | 6315489 | 2.72E-28 | 0.012367 |
| CS3 | rs112935616 | 6236830 | 5.44E-28 | 0.011728 |
| CS3 | rs7851000   | 6314487 | 2.86E-28 | 0.011704 |

PIP: Posterior inclusion probabilities calculated using SuSiE; p Values from *Pividori et al* COA GWAS (logistic regression).

**Supplementary Table 3.** Transcription factors bound to the risk or non-risk EMSA probes identified by mass spectrometry (see methods). EMSA Probes- (risk) rs10975479 (G): rs188808 (T); (non-risk) rs10975479 (A): rs188808 (C).

| <i>Transcription factor</i> | <i>G-T probe</i> | <i>Control</i> | <i>function</i>                                                     |
|-----------------------------|------------------|----------------|---------------------------------------------------------------------|
| STAT3*                      | 1                | 0              | Signal transducer and activator of transcription 3;STAT3;ortholog   |
| STAT5A*                     | 3                | 0              | Signal transducer and activator of transcription 5A;STAT5A;ortholog |
| POU2F1*                     | 2                | 0              | POU domain, class 2, transcription factor 1;POU2F1;ortholog         |
| FOXP1*                      | 1                | 0              | Forkhead box protein P1;FOXP1;ortholog                              |
| NFYC                        | 2                | 0              | Nuclear transcription factor Y subunit gamma;NFYC;ortholog          |
| FUS                         | 3                | 0              | RNA-binding protein FUS;FUS;ortholog                                |
| PUF60                       | 6                | 0              | Poly(U)-binding-splicing factor PUF60;PUF60;ortholog                |
| ZFX4                        | 1                | 0              | Zinc finger homeobox protein 4;ZFX4;ortholog                        |
| CAND1                       | 3                | 0              | Cullin-associated NEDD8-dissociated protein 1;CAND1;ortholog        |
| CNOT1                       | 1                | 0              | CCR4-NOT transcription complex subunit 1;CNOT1;ortholog             |
| HMGB1P1                     | 2                | 0              | Putative high mobility group protein B1-like 1                      |
| HMGB2                       | 1                | 0              | High mobility group protein B2;HMGB2;ortholog                       |
| TARDBP                      | 3                | 0              | TAR DNA-binding protein 43;TARDBP;ortholog                          |
| QKI                         | 1                | 0              | Protein quaking;QKI;ortholog                                        |
| CTBP1                       | 4                | 0              | C-terminal-binding protein 1;CTBP1;ortholog                         |
| ERH                         | 2                | 0              | Enhancer of rudimentary homolog;ERH;ortholog                        |
| RBM14                       | 1                | 0              | RNA-binding protein 14;RBM14;ortholog                               |
| SND1                        | 2                | 0              | Staphylococcal nuclease domain-containing protein 1;SND1;ortholog   |
| <i>Transcription factor</i> | <i>A-C probe</i> | <i>Control</i> | <i>function</i>                                                     |
| FOXL2*                      | 1                | 0              | Forkhead box protein L2;FOXL2;ortholog                              |
| NFE2*                       | 1                | 0              | Transcription factor NF-E2 45 kDa subunit;NFE2;ortholog             |
| TFCP2*                      | 1                | 0              | Alpha-globin transcription factor CP2;TFCP2;ortholog                |
| MYCBP                       | 2                | 0              | C-Myc-binding protein;MYCBP;ortholog                                |
| DDI2                        | 2                | 0              | Protein DDI1 homolog 2;DDI2;ortholog                                |
| NFYB                        | 1                | 0              | Nuclear transcription factor Y subunit beta;NFYB;ortholog           |
| HMGB1                       | 1                | 0              | High mobility group protein B1;HMGB1;ortholog                       |
| CTBP1                       | 3                | 0              | C-terminal-binding protein 1;CTBP1;ortholog                         |
| ERH                         | 1                | 0              | Enhancer of rudimentary homolog;ERH;ortholog                        |
| RBM14                       | 1                | 0              | RNA-binding protein 14;RBM14;ortholog                               |
| SND1                        | 2                | 0              | Staphylococcal nuclease domain-containing protein 1;SND1;ortholog   |

\* transcription factors with known DNA binding motifs bound only to the risk or non-risk probe

**Supplementary Table 4.** Transcription factors predicted by TRANSFAC to bind the non- risk (NR) or the risk (R) alleles of SNPs rs1888909 and rs10975479

| <i>rs1888909C (NR)</i> | <i>rs1888909T (R)</i> | <i>rs10975479A (NR)</i> | <i>rs10975479G (R)</i> |
|------------------------|-----------------------|-------------------------|------------------------|
| HIF-1                  | YY1                   | En1                     | TEAD1                  |
| c-myc                  | TFII-I                | FoxD3                   | HOXA5                  |
| USF-1 (EBOX)           | NFIC                  | Sox3                    | Nrf2:Mafk              |
| MAX                    | Hltf                  | Sox6                    | MyoD                   |
| ZNF354C                | OCT-1                 | AR                      | myogenin               |
| ARNT(HIFF)             | SMARCA3(RUSH)         | SRY                     | DPB                    |
| NMYC (EBOX)            |                       | NR3C1                   | CREMtau                |
| CHREBP (CHRE)          |                       | Sox9                    |                        |
|                        |                       | Sox17                   |                        |
|                        |                       | Sox2                    |                        |
|                        |                       | GA-BF                   |                        |
|                        |                       |                         |                        |

**Supplementary Table 5.** Comparison between *IL33* expression and protein levels between genotypes for SNPs rs10975479, rs1888909 and rs992969. Confidence interval (95%CI), *p* values and beta shown for each sample group and genotype were obtained by linear regression

| <i>Dataset</i>                | <i>SNP</i> | <i>p value</i> | <i>beta</i> | <i>95%CI</i> |
|-------------------------------|------------|----------------|-------------|--------------|
| Endobronchial cells/CAG       | rs10975479 | 0.11           | 0.12        | -0.03-0.26   |
| (mRNA)                        | rs1888909  | 0.0072         | 0.14        | 0.04-0.24    |
|                               | rs992969   | 0.035          | 0.11        | 0.008-0.22   |
| Nasal epithelial cells/ URECA | rs10975479 | 0.040          | 0.216       | 0.011-0.640  |
| (mRNA)                        | rs1888909  | 6.58 E-6       | 0.289       | 0.167-0.411  |
|                               | rs992969   | 0.0089         | 0.180       | 0.047-0.314  |
| Plasma /Hutterites            | rs10975479 | 0.87           | 0.09        | -0.94-1.12   |
| (protein)                     | rs1888909  | 0.0026         | 1.47        | 0.52-2.41    |
|                               | rs992969   | 0.0073         | 1.50        | 0.44-2.57    |

CAG: Chicago Asthma Genetics Study, URECA: Urban Environment and Childhood Asthma (URECA)

**Supplementary Table 6.** eQTL analysis in human nasal epithelial cells from a birth cohort of children at high risk for asthma (URECA) showing association between variant rs1888909 and genes in the *IL33* locus. *p* Values and beta were obtained through linear regression. Source data are provided as a Source Data file.

| <i>Gene</i>     | <i>p value</i> | <i>beta</i> |
|-----------------|----------------|-------------|
| <i>ERMP1</i>    | 0.165          | -0.049      |
| <i>KIAA2026</i> | 0.115          | -0.058      |
| <i>MLANA</i>    | 0.82           | 0.041       |
| <i>RANBP6</i>   | 0.384          | 0.044       |
| <i>IL33</i>     | 6.58E-6        | 0.289       |
| <i>UHRF2</i>    | 0.864          | 0.010       |
| <i>GLDC</i>     | 0.68           | -0.047      |



**Supplementary Table 7.** List of primers

|                                        | <b><i>For BAC recombneering-</i></b>                                                                                                                 |
|----------------------------------------|------------------------------------------------------------------------------------------------------------------------------------------------------|
| IL33-CrimsonKan_F<br>IL33-CrimsonKan_R | TTGAGACAAATGAACTAATATTATATTTAATCCAACAGAATACTGAAAAATGGATAGCACTGAGAACGTCA<br>GCGTAAAACATTCAGAGATAACTTAAGTCCTTACTTCCCAGCTTGAAACATCAGAAGAAGCTCGTCAAGAAGG |
| IL33InsDEL_F:<br>IL33InsDEL_R:         | GCACACCTGTAAGTCTCTGCATTTTGCCACTTATACAACCTCATCTTTGAGTGGCACTTTTCGGGGAAATG<br>AAACTTACATCAAATAAAATCTCAACACAGAATTCATACATGTCAACATACTCGAGGCTAGCTCTAGAAGTC  |
| IL33-Crm5'_F:<br>IL33-Crm5'_R          | AGCCACAGTTGTTTCCGTTT<br>TTGAGGTAGTCGGGGATGTC                                                                                                         |
| IL-33-Crm3'_F'<br>IL-33-Crm3'_R        | ATCGCCTTCTATCGCCTTCT<br>TGTGGAGCAAAAAGTGGTTG                                                                                                         |
|                                        | <b><i>For EMSA</i></b>                                                                                                                               |
| rs10975479G:rs1888909T:                | TCTGATGCAGAACAGCAATGTGTTTTCCATGTGCACTTGGTC                                                                                                           |
| rs10975479G:rs1888909C:                | CCTGATGCAGAACAGCAATGTGTTTTCCACGTGCACTTGGTC                                                                                                           |
| rs10975479A:rs1888909T                 | TCTGATGCAGAACAACAATGTGTTTTCCATGTGCACTTGGTC                                                                                                           |
| rs10975479A:rs1888909C                 | CCTGATGCAGAACAACAATGTGTTTTCCACGTGCACTTGGTC                                                                                                           |
| Consensus OCT-1_F:                     | TGTCGAATGCAAATCACTAGAA                                                                                                                               |
| Mutant OCT-1_R                         | TGTCGAATGCAAGCCACTAGAA.                                                                                                                              |
|                                        | <b><i>For Luciferase assay</i></b>                                                                                                                   |
| attB1ins5K_F<br>attB1ins5K_R           | GGGGACAAGTTTGTACAAAAAAGCAGGCTGCGCTTACATAGGGTCAGATTC<br>GGGGACCACTTTGTACAAGAAAGCTGGGTAGATGCAGAGCTCCTGTAGTC                                            |
|                                        | <b><i>For qPCR</i></b>                                                                                                                               |
| E2-Crimson_F<br>E2-Crimson_R           | GCCAAGCTGCAAGTGACCAA<br>GCCTTGGAGCCGTAGAAGAA                                                                                                         |
| Ppia_F<br>Ppia_R                       | AATGCTGGACCAAACACAAA<br>CCTTCTTTCACCTTCCCAAA                                                                                                         |
| OCT-1 F<br>OCT-1 R                     | GCCTCTGGTCTCAGTGGATA<br>CTGCTCATAGGAGACACAGTAAAG                                                                                                     |

F: forward primer (5→3); R: reverse primer (5→3)

**Supplementary Table 8.** List of antibodies

| <b>Antibody</b>                                          | <b>Host species</b> | <b>Vendor</b>         | <b>Cat #</b> | <b>Amount/Dilution</b> |
|----------------------------------------------------------|---------------------|-----------------------|--------------|------------------------|
| Oct-1 (C-21)                                             | rabbit              | Santa Cruz            | sc-232x      | 5 µg ChIP, 2ug EMSA    |
| IgG control                                              | rabbit              | Santa Cruz            | sc-2027      | 5 µg ChIP, 2ug EMSA    |
| Biotin anti-mouse CD31 (clone 390)                       | rat                 | Biologend             | 102404       | 1:250                  |
| CD31 Monoclonal Antibody (clone 2H8)                     | Armenian hamster    | Thermo Fisher         | MA3105       | 1:500                  |
| Living Colors DsRed Polyclonal Antibody: anti-E2 Crimson | rabbit              | Takara Bio            | 632496       | 1:500                  |
| Alexa Fluor 488 Streptavidin:                            | goat?               | Biologend             | 405235       | 1:250                  |
| Anti- Armenian hamster Alex Fluor 568                    | goat                | AbCam                 | ab175716     | 1:1,000                |
| Anti-rabbit Alexa Fluor 633                              | goat                | Thermo Fisher         | A-21070      | 1:1,000                |
| FOXP1                                                    |                     | Aviva Systems Biology | ARP32564     | 2 ug                   |
| Max (C-17)                                               | rabbit              | Santa Cruz            | sc-197x      | 2 ug                   |
| USF-1 (C-20)                                             | rabbit              | Santa Cruz            | sc-229x      | 2 ug                   |
| USF-2 (C-20)                                             | rabbit              | Santa Cruz            | sc-862x      | 2 ug                   |
| HIF1a (H-206)                                            | rabbit              | Santa Cruz            | sc-10790     | 2 ug                   |
| c-MYC (C-20)                                             | rabbit              | Novus Biological      | NB-600-302   | 2 ug                   |
| DEC1                                                     | rabbit              | Novus Biological      | NB-100-1800  | 2 ug                   |
| YY-1 (C20)                                               | rabbit              | Santa Cruz            | sc-281       | 2 ug                   |
| n-MYC (9E10)                                             | mouse               | Novus Biological      | NB-200-109   | 2 ug                   |
| Stat3 (C-20)                                             | rabbit              | Santa Cruz            | sc-482x      | 2 ug                   |
